# Supplementary material
Source: PubMed Central journal article supplement (PMC4978875)
Supplement: rstb20150319supp1.pdf [file rstb20150319supp1.pdf]

**Table S1.** Scheme for conversion of the biomes of Olson *et al.* (2001) to: (1) tropical forest; (2) tropical grassy biomes; or (3) other tropical biomes / uncertain. The 30 ecoregions which were not classified according to this scheme – based on our are listed.

| <b>Olson <i>et al.</i> (2001) biome</b>                       | <b>TGB or tropical forest (or other)?</b> | <b>Exceptions</b>                                                                                                                                                                                                                                                                                                                                                                                                                                                                                                                                                                                                                                              |
|---------------------------------------------------------------|-------------------------------------------|----------------------------------------------------------------------------------------------------------------------------------------------------------------------------------------------------------------------------------------------------------------------------------------------------------------------------------------------------------------------------------------------------------------------------------------------------------------------------------------------------------------------------------------------------------------------------------------------------------------------------------------------------------------|
| Deserts and xeric shrublands                                  | other tropical / uncertain                | Deccan thorn scrub forests = TGB                                                                                                                                                                                                                                                                                                                                                                                                                                                                                                                                                                                                                               |
| Flooded grasslands and savannas                               | TGB                                       | -                                                                                                                                                                                                                                                                                                                                                                                                                                                                                                                                                                                                                                                              |
| Mangroves                                                     | other tropical / uncertain                | -                                                                                                                                                                                                                                                                                                                                                                                                                                                                                                                                                                                                                                                              |
| Montane grasslands and shrublands                             | TGB                                       | Kinabalu montane alpine meadows = other tropical / uncertain                                                                                                                                                                                                                                                                                                                                                                                                                                                                                                                                                                                                   |
| *Temperate coniferous forests                                 | tropical forest                           | Florida sand pine scrub = TGB                                                                                                                                                                                                                                                                                                                                                                                                                                                                                                                                                                                                                                  |
| *Temperate grasslands, savannas, and shrublands               | TGB                                       | -                                                                                                                                                                                                                                                                                                                                                                                                                                                                                                                                                                                                                                                              |
| Tropical and subtropical coniferous forests                   | tropical forest                           | Bahamian pine mosaic = TGB<br>Belizian pine forests = TGB<br>Hispaniolan pine forests = TGB<br>Luzon tropical pine forests = TGB<br>Miskito pine forests = TGB                                                                                                                                                                                                                                                                                                                                                                                                                                                                                                 |
| Tropical and subtropical dry broadleaf forests                | other tropical / uncertain                | Central Deccan Plateau dry deciduous forests = TGB<br>Central Indochina dry forests = TGB<br>Chiquitano dry forests = TGB<br>Fiji tropical dry forests = TGB<br>Hawaii tropical dry forests = TGB<br>Irrawaddy dry forests = TGB<br>Khathiar–Gir dry deciduous forests = TGB<br>Lesser Sundas deciduous forests = TGB<br>South Deccan Plateau dry deciduous forests = TGB<br>Southeastern Indochina dry evergreen forests = TGB<br>Southern Vietnam lowland dry forests = TGB<br>Sri Lanka dry-zone dry evergreen forests = TGB<br>Sumba deciduous forests = TGB<br>Timor and Wetar deciduous forests = TGB<br>Zambeian <i>Cryptosepalum</i> dry forests = TGB |
| Tropical and subtropical grasslands, savannas, and shrublands | TGB                                       | Dry Chaco = other tropical / uncertain<br>Hawaii tropical low shrublands = other tropical / uncertain<br>Itigi–Sumbu thicket = other tropical / uncertain<br>Northwestern Hawaii scrub = other tropical / uncertain<br>St. Helena scrub and woodlands = other tropical / uncertain                                                                                                                                                                                                                                                                                                                                                                             |
| Tropical and subtropical moist broadleaf forests              | tropical forest                           | Madagascar subhumid forests = TGB<br>Mato Grosso seasonal forests = other tropical / uncertain                                                                                                                                                                                                                                                                                                                                                                                                                                                                                                                                                                 |

\* Note that these biomes were defined as ‘temperate’ by Olson *et al.* (2001), but were considered ‘tropical’ according to our definition based on minimum monthly temperature  $\geq 15^{\circ}\text{C}$ .

**Table S2.** Results of the model ranking procedure to identify the best models of species richness, with models ranked according to the Akaike Information Criterion,  $AIC_c$ .  $\Delta AIC_c$  is the difference between the model's  $AIC_c$  value and the minimum  $AIC_c$  value in the candidate set.  $w_i$  is the Akaike weight, or the probability of the model being the best in the candidate set. Well-supported models ( $\Delta AIC_c \leq 2$ ) are shown in bold.

| Model                                                | $\Delta AIC_c$ | $w_i$       |
|------------------------------------------------------|----------------|-------------|
| (a) Mammals                                          |                |             |
| <b>realm * [log(rainfall) + latitude]</b>            | <b>0.0</b>     | <b>0.63</b> |
| <b>realm * [log(rainfall) + latitude] + TGB</b>      | <b>1.8</b>     | <b>0.25</b> |
| realm * log(rainfall)                                | 4.1            | 0.08        |
| realm * log(rainfall) + TGB                          | 5.5            | 0.04        |
| realm * latitude + TGB                               | 12.6           | 0.00        |
| realm * latitude                                     | 13.7           | 0.00        |
| realm + TGB                                          | 17.5           | 0.00        |
| realm                                                | 19.3           | 0.00        |
| (b) Birds                                            |                |             |
| <b>realm * log(rainfall) + TGB</b>                   | <b>0.0</b>     | <b>0.59</b> |
| <b>realm * log(rainfall)</b>                         | <b>0.9</b>     | <b>0.37</b> |
| realm * [log(rainfall) + latitude] + TGB             | 6.6            | 0.02        |
| realm * [log(rainfall) + latitude]                   | 7.7            | 0.01        |
| realm + TGB                                          | 31.9           | 0.00        |
| realm * latitude + TGB                               | 37.6           | 0.00        |
| realm                                                | 42.3           | 0.00        |
| realm * latitude                                     | 47.1           | 0.00        |
| (c) Amphibians                                       |                |             |
| <b>realm * log(rainfall)</b>                         | <b>0.0</b>     | <b>0.73</b> |
| realm * log(rainfall) + TGB                          | 2.2            | 0.25        |
| realm * [log(rainfall) + latitude]                   | 7.2            | 0.02        |
| realm * [log(rainfall) + latitude] + TGB             | 9.4            | 0.01        |
| realm + TGB                                          | 55.2           | 0.00        |
| realm                                                | 57.0           | 0.00        |
| realm * latitude + TGB                               | 60.0           | 0.00        |
| realm * latitude                                     | 61.3           | 0.00        |
| (d) Vascular plants                                  |                |             |
| <b>log(area) * realm * log(rainfall) + TGB</b>       | <b>0.0</b>     | <b>1.00</b> |
| log(area) * realm * [log(rainfall) + latitude] + TGB | 16.3           | 0.00        |
| log(area) * realm * log(rainfall)                    | 41.1           | 0.00        |
| log(area) * realm * latitude + TGB                   | 41.6           | 0.00        |
| log(area) * realm + TGB                              | 42.5           | 0.00        |
| log(area) * realm * [log(rainfall) + latitude]       | 58.2           | 0.00        |
| log(area) * realm * latitude                         | 120.0          | 0.00        |
| log(area) * realm                                    | 126.3          | 0.00        |
