# Supplementary material
Source: PubMed Central journal article supplement (PMC4978875)
Supplement: rstb20150319supp2.pdf [file rstb20150319supp2.pdf]

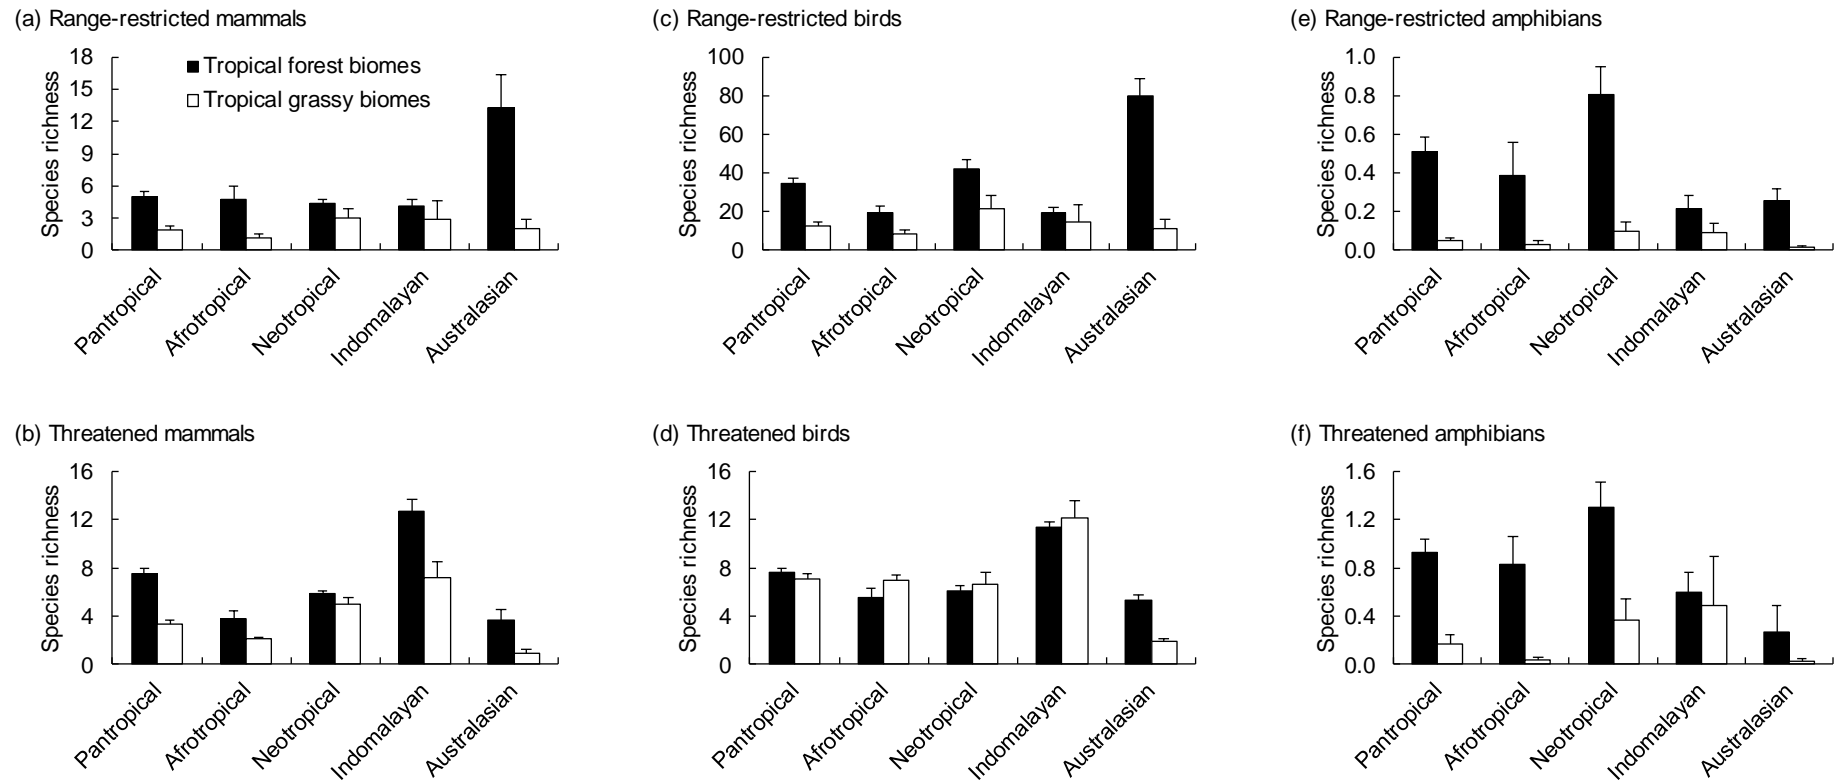

**Figure S1.** Comparison of species richness between tropical forest and tropical grassy biomes in each biogeographic realm, for key vertebrate groups (a) range-restricted mammals; (b) threatened mammals; (c) range-restricted birds; (d) threatened birds; (e) range-restricted amphibians; (f) threatened amphibians. The means are calculated from the values for each tropical ecoregion. The error bars indicate standard error of the mean (of ecoregions).
